# Supplementary material
Source: HighWire-hosted journal article supplement (https://openres.ersjournals.com/content/4/2/00170-2017)
Supplement: inline-supplementary-material-1 [file inline-supplementary-material-1.pdf]

## Appendix 2. Scoring Matrix

|                                                                                                                                                                                                                                                                                                                                                                                                                                                                                                                                                                                                                                                                                                                                                                                                                                                                                    |                                                                                                                                                                                                                                                                                                                                                                                                                                                                                                                                        |
|------------------------------------------------------------------------------------------------------------------------------------------------------------------------------------------------------------------------------------------------------------------------------------------------------------------------------------------------------------------------------------------------------------------------------------------------------------------------------------------------------------------------------------------------------------------------------------------------------------------------------------------------------------------------------------------------------------------------------------------------------------------------------------------------------------------------------------------------------------------------------------|----------------------------------------------------------------------------------------------------------------------------------------------------------------------------------------------------------------------------------------------------------------------------------------------------------------------------------------------------------------------------------------------------------------------------------------------------------------------------------------------------------------------------------------|
| <p><b>I. SYMPTOMS</b></p> <p>1 { No Symptoms (out of 8 possible)</p> <p>2 { One symptom (respiratory [R] or Constitutional [C]) not including hemoptysis</p> <p>3 { Two symptoms (not including hemoptysis); 1R/1C, or 2R, or 2C<br/>Three symptoms (not including hemoptysis) – all R or all C</p> <p>4 { Three symptoms (not including hemoptysis); mix of R and C<br/>Hemoptysis with or without other symptoms; or four or more symptoms (not including hemoptysis).</p>                                                                                                                                                                                                                                                                                                                                                                                                       | <p><b>II. DYSPNEA</b></p> <p>1 { Dyspnea at rest</p> <p>2 { Dyspnea with minimal exertion (distinguished from fatigue)</p> <p>3 { Dyspnea with heavy exertion (distinguished from fatigue)</p> <p>4 { No dyspnea</p>                                                                                                                                                                                                                                                                                                                   |
| <p><b>III. DURATION OF SYMPTOMS ATTRIBUTED TO TB</b></p> <p>1 { Asymptomatic</p> <p>2 { Symptoms &lt; 2 weeks</p> <p>3 { Symptoms 2-4 weeks</p> <p>4 { Symptoms 5 or more weeks</p>                                                                                                                                                                                                                                                                                                                                                                                                                                                                                                                                                                                                                                                                                                | <p><b>IV. FAILURE TO RESPOND TO BROAD SPECTRUM ANTIBIOTICS</b></p> <p>1 { No prescriptions within the past 6 months.</p> <p>2 { One prescription between 4-6 months of diagnosis.</p> <p>3 { One prescription within the past 3 months</p> <p>4 { Two or more prescriptions within the past 6 months.</p>                                                                                                                                                                                                                              |
| <p><b>V. EPIDEMIOLOGICAL RISK OF INFECTION</b></p> <p>1 { No history of TB; no epidemiologic risk LTBI, negative historical IGRA<br/>No history of TB; no epidemiologic risk LTBI, negative historical TST.<br/>No history of TB; no epidemiologic risk LTBI; no IGRA or TST on record.</p> <p>2 { Past history of TB or LTBI; adequately treated.<br/>No history of TB, epidemiologic risk for LTBI (untreated); no TST or IGRA.</p> <p>3 { No history of TB, epidemiologic risk for recent (&lt;2 yr) LTBI (untreated); no TST or IGRA.<br/>No history of TB, epidemiologic risk for LTBI (untreated); positive TST.<br/>No history of TB, epidemiologic risk for LTBI (untreated); positive IGRA.</p> <p>4 { No history of TB, epidemiologic risk for recent (&lt; 2yr) LTBI; positive TST or IGRA.<br/>Past history of TB, inadequately treated or no record of treatment.</p> | <p><b>VI. PRESENCE OF A HIGH OR MODERATE RISK FACTOR FOR REACTIVATION OF LTBI</b></p> <p>1 { No risk factor.<br/>One or more slight, low or very low risk factors.</p> <p>2 { One moderate risk factor</p> <p>3 { Two or more moderate risk factors<br/>One high risk factor (other than HIV) with or without one moderate risk factor.</p> <p>4 { One high risk factor (other than HIV) and two or more moderate risk factors.<br/>Two high risk factors (other than HIV) with or without a moderate risk factor.<br/>HIV or AIDS</p> |
| <p><b>VII. COMPLETE BLOOD COUNT</b></p> <p>1 { Normal hemoglobin and leucocytosis.</p> <p>2 { Normal hemoglobin, normal or low leucocyte count.</p> <p>3 { Anemia and leucocytosis.</p> <p>4 { Anemia and normal or low leucocyte count</p>                                                                                                                                                                                                                                                                                                                                                                                                                                                                                                                                                                                                                                        | <p><b>VIII. CHEST RADIOGRAPH</b></p> <p>Typical = new upper lung zone dominant infiltrate with or without cavitation but no discernible adenopathy.</p> <p>Atypical = all others.</p>                                                                                                                                                                                                                                                                                                                                                  |
